# Supplementary material for: Regulation of Ptch1 by miR-342-5p and FoxO3 Induced Autophagy Involved in Renal Fibrosis
Source: Front Bioeng Biotechnol. 2020 Oct 29;8:583318. doi: 10.3389/fbioe.2020.583318 (PMC7673434; doi:10.3389/fbioe.2020.583318)
Supplement: Supplementary file 1 [file Table_1.XLSX]

## Sheet: Sheet1
Supplementary Material: Table S1 GO annotation and KEGG pathway of miR-342-5p
	Term	PValue	Count	一Log10(P)	database
GO annotation	cell	2.58e-59	196	58.5884	Tarbase
	intracellular	6.47e-38	185	37.1891	Tarbase
	anatomical structure development	4.04e-14	72	13.3936	Tarbase
	organelle	1.47e-13	161	12.8327	Tarbase
	biological_process	3.86e-12	247	11.4134	Tarbase
	embryo development	2.66e-08	28	7.57512	Tarbase
	cell differentiation	3.3e-08	54	7.48149	Tarbase
	cytoplasm	3.41e-07	161	6.46725	Tarbase
	homeostatic process	2.04e-06	28	5.69037	Tarbase
	ion binding	6.36e-06	97	5.19654	Tarbase
	biosynthetic process	0.00125789	65	2.90036	Tarbase
	anatomical structure formation involved in morphogenesis	0.00706147	18	2.1511	Tarbase
	in utero embryonic development	0.0157961	13	1.80145	Tarbase
	isocitrate metabolic process	0.0191376	3	1.71811	Tarbase
	generation of precursor metabolites and energy	0.0191376	11	1.71811	Tarbase
	lipid metabolic process	0.0291869	27	1.53481	Tarbase
	chromosome organization	0.0426221	13	1.37036	Tarbase
	pre-autophagosomal structure	0.0436059	4	1.36045	Tarbase
	mRNA transport	0.0436059	6	1.36045	Tarbase
	small molecule metabolic process	0.0436059	38	1.36045	Tarbase
	RNA polymerase II regulatory region sequence-specific DNA binding	0.0454857	8	1.34212	Tarbase
	cell	1.47e-07	41	6.83268	microT-CDS
	anatomical structure development	1.9e-05	22	4.72125	microT-CDS
	cell differentiation	0.000100302	19	3.99869	microT-CDS
	intracellular	0.0277314	34	1.55703	microT-CDS
	biological_process	0.0277314	61	1.55703	microT-CDS
	adult behavior	0.0399339	3	1.39866	microT-CDS
	cell	2.06e-55	240	54.6861	Targetscan
	intracellular	1.95e-20	203	19.71	Targetscan
	anatomical structure development	9.63e-16	92	15.0164	Targetscan
	biological_process	8.86e-13	337	12.0526	Targetscan
	cell differentiation	6.15e-06	62	5.21112	Targetscan
	molecular_function	2.22e-05	326	4.65365	Targetscan
	embryo development	0.00124062	25	2.90636	Targetscan
	cerebellar mossy fiber	0.00528749	4	2.27675	Targetscan
	organelle	0.0151644	170	1.81918	Targetscan
	protein transmembrane transport	0.0333724	4	1.47661	Targetscan
	cellular_component	0.0390297	319	1.4086	Targetscan
	enzyme regulator activity	0.0397525	24	1.40064	Targetscan
KEGG pathway	Signaling pathways regulating pluripotency of stem cells	1.71e-09	18	8.767	Tarbase
	Proteoglycans in cancer	1.39e-06	21	5.85699	Tarbase
	TGF-beta signaling pathway	0.00105076	10	2.9785	Tarbase
	Wnt signaling pathway	0.00108618	13	2.9641	Tarbase
	Hippo signaling pathway	0.00108618	18	2.9641	Tarbase
	Pathways in cancer	0.00125017	37	2.90303	Tarbase
	Nicotine addiction	0.00195877	5	2.70802	Tarbase
	Axon guidance	0.00487652	15	2.31189	Tarbase
	mTOR signaling pathway	0.00977688	10	2.0098	Tarbase
	Phosphatidylinositol signaling system	0.0115349	8	1.93799	Tarbase
	Bacterial invasion of epithelial cells	0.0226543	10	1.64485	Tarbase
	Glycosphingolipid biosynthesis - lacto and neolacto series	0.0322847	2	1.491	Tarbase
	T cell receptor signaling pathway	0.0482119	12	1.31685	Targetscan
